# Supplementary material for: Facile fabrication of layer-cake-like nano-micro hierarchical structure for high performance Li storage
Source: Royal Society of Chemistry journal article supplement (doi:10.1039/c7ra04326k), 2017-01-01
Supplement: c7ra04326k1.pdf [file c7ra04326k1.pdf]

## Electronic Supplementary Information

### **Facile fabrication of Layer-Cake-like with Nano-Micro Hierarchical Structure for High Performance Li Storage**

*Lihui Mou, ‡<sup>a</sup> Jia Yu, ‡<sup>bc</sup>, Lili Liu\*<sup>a</sup>, Xiuyun Zhang<sup>d</sup> and Shimou Chen\*<sup>bc</sup>*

## Supplementary Figures

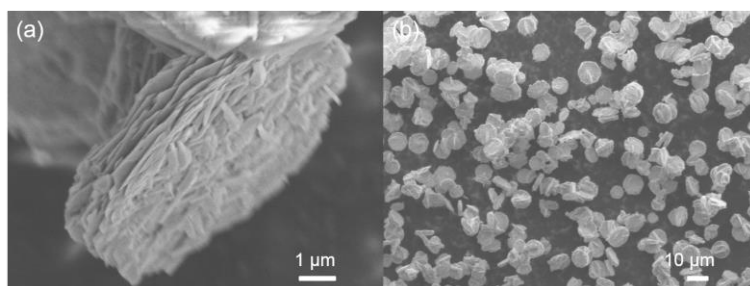

**Figure S1** Morphologies of the layer-cake-like  $\text{Co(OH)F}$  precursor after hydrothermal synthesis.

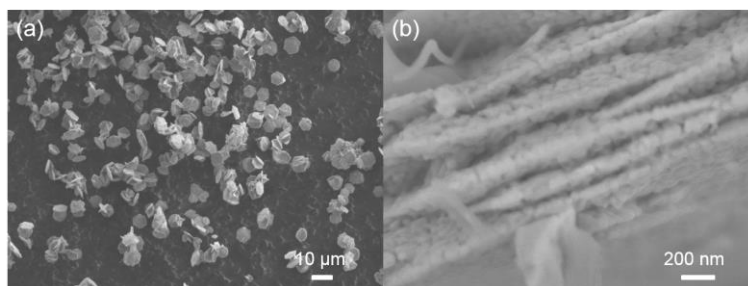

**Figure S2** Morphologies of the layer-cake-like  $\text{Co}_3\text{O}_4$  after calcination.

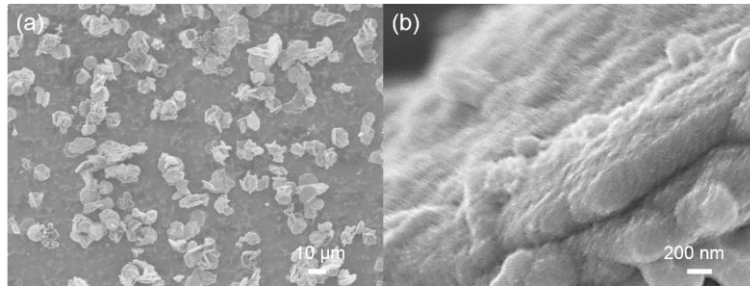

**Figure S3** Morphologies of the layer-cake-like  $\text{Co}_3\text{O}_4/\text{C}$  after carbon coating treatment.

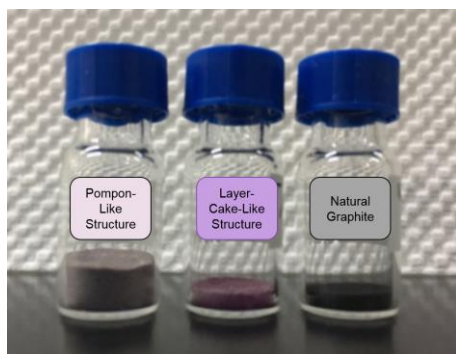

**Figure S4** The comparison of tap densities for layer-cake-structure precursor, pompon-structure precursor and natural graphite, with the same mass of 300 mg.

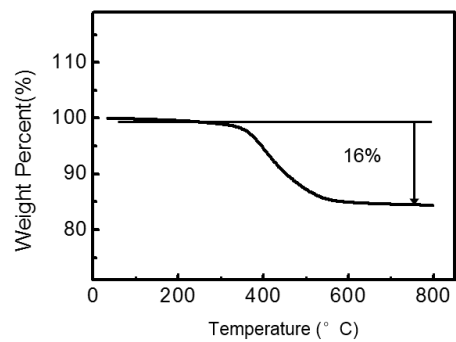

**Figure S5** TG analysis curve of  $\text{Co}_3\text{O}_4/\text{C}$  displaying the presence of 16% carbon.

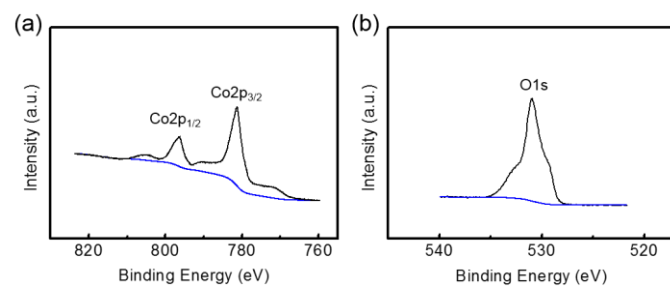

**Figure S6.** (a) Co2p and (b) O1s states XPS characterizations of the  $\text{Co}_3\text{O}_4$ .

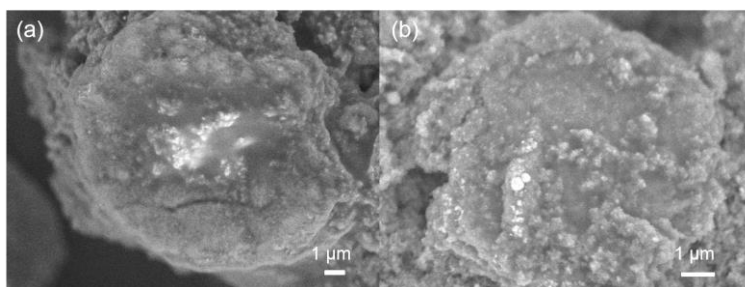

**Figure S7** Morphology of the Co<sub>3</sub>O<sub>4</sub>/C electrode after 500 cycles, at a current density of 500 mA g<sup>-1</sup>.
